# Supplementary material for: A Method to Explore Variations of Ventilator-Associated Event Surveillance Definitions in Large Critical Care Databases in the United States
Source: PubMed Central journal article supplement — Crit Care Explor. 2022 Nov 15;4(11):e0790. doi: 10.1097/CCE.0000000000000790 (PMC9668560; doi:10.1097/cce.0000000000000790), 2022-11-15
Supplement: cc9-4-e0790-s001.pdf [file cc9-4-e0790-s001.pdf]

## Table of Contents

### eTables

|                                                        |    |
|--------------------------------------------------------|----|
| eTable 1. Background literature table of studies       | 5  |
| eTable 2. Inclusion/exclusion criteria and limitations | 11 |

### eFigures

|                                                                                                                                                                                                         |    |
|---------------------------------------------------------------------------------------------------------------------------------------------------------------------------------------------------------|----|
| eFigure 1. VAE criteria, including VAC, IVAC, PVAP                                                                                                                                                      | 14 |
| eFigure 2. Different ventilator requirement scenarios.                                                                                                                                                  | 15 |
| eFigure 3. Difference between calendar day and 24-hour time intervals.                                                                                                                                  | 18 |
| eFigure 4. Time definition between calendar days and 24-hour periods                                                                                                                                    | 20 |
| eFigure 5. Additional examples of explorations                                                                                                                                                          | 21 |
| eFigure 5a. Using calendar day time intervals, $\Delta\text{minFiO}_2 \geq 40\%$ , $\Delta\text{minPEEP} \geq 3$ .                                                                                      | 21 |
| eFigure 5b. Using 24 hour time intervals, $\Delta\text{minFiO}_2 \geq 20\%$ , $\Delta\text{minPEEP} \geq 3$ .                                                                                           | 23 |
| eFigure 5c. Using CDC VAC criteria ( $\Delta\text{minFiO}_2 \geq 20\%$ , $\Delta\text{minPEEP} \geq 3$ , calendar day time intervals) for late VAC (VAC developed on day 7 or later)                    | 25 |
| eFigure 5d. Using CDC VAC criteria ( $\Delta\text{minFiO}_2 \geq 20\%$ , $\Delta\text{minPEEP} \geq 3$ , calendar day time intervals) for respiratory SOFA score $\geq 3$ (implying P/F ratio $< 200$ ) | 27 |

## Supplemental text

<intentionally left blank>

## eTables

**eTable 1. Background literature table of studies**

< The rest of this page intentionally left blank. >

**eTable 1: Background Literature Table of Studies: Ventilator Associated Events**

| Citation                                                                                                                                                                                                                   | Sample Method Years                                                                                                                                                                                                                                        | 2013/2017 HNSN Definitions | VAE | VAC | IVAC | PVAP | VAP 2008 HNSN Definition | Measured outcomes                  | Severity of illness score                                                                  | Results                                                                                                                                                                                                                                                             | Data-Driven Surveillance Model | Comments                                                                                                                                                                                                          |
|----------------------------------------------------------------------------------------------------------------------------------------------------------------------------------------------------------------------------|------------------------------------------------------------------------------------------------------------------------------------------------------------------------------------------------------------------------------------------------------------|----------------------------|-----|-----|------|------|--------------------------|------------------------------------|--------------------------------------------------------------------------------------------|---------------------------------------------------------------------------------------------------------------------------------------------------------------------------------------------------------------------------------------------------------------------|--------------------------------|-------------------------------------------------------------------------------------------------------------------------------------------------------------------------------------------------------------------|
| He et al. (2021) The epidemiology and clinical outcomes of ventilator-associated events among 20,769 mechanically ventilated patients at intensive care units: an observational study. <i>Crit Care</i> . 2021 2;25(1):44. | 20,769 MV patients<br>11,697 MV days.<br><br>N= 6,252 >4 days MV.<br>1882 VAC<br>712 IVAC<br>185 PVAP<br><br>Retrospective Registry<br>Single Center, 5 ICUs (China)<br><br>Years April 2015-Dec 2018                                                      | Yes                        | X   | X   | X    | X    | No                       | Mortality<br>VAE<br>Non-VAE        | APACHE II score                                                                            | VAC rate: 16.7 per 1000 MV days.<br>IVAC rate: 6.4 per 1000 MV days.<br>PVAP rate: 1.64 per 1000 MV days.<br><br>Hospital mortality with a VAE was more than 3-times higher than non-VAE.<br>VAE rates varied by ICU.<br>VAE typically occurred early in MV course. | No                             | Retrospective analysis of prospectively collected hospital acquired infections registry.<br>Some MV patients had more than one VAC event: 1780 patients with 1882 VAC events.<br><br>Compared VAEs with non-VAEs. |
| Fang et al. (2020) Risk factors and associated outcomes of ventilator-associated events developed in 28 days among sepsis patients admitted to intensive care unit. <i>Sci Rep</i> . 2020, 29;10(1):12702.                 | 2,295 admissions<br>N=453 consecutive MV patients with sepsis.<br>118 VAE<br>33 <u>Early-VAE</u> onset <7 days MV.<br>85 <u>Late-VAE</u> onset 7-28 days MV.<br><br>Retrospective<br>Single Center, 3 medical ICUs (Taiwan)<br>Years: Aug 2013-to-Jan 2016 | Yes                        | X   |     |      |      | No                       | Mortality<br>Early VAE<br>Late VAE | APACHE II score<br><br>SOFA score and sub-scores<br><br>Charleston Comorbidity Index (CCI) | Early VAE (n = 33) associated with higher mortality than non-VAE.<br>Late VAE had longer MV days than non-VAE.                                                                                                                                                      | No                             | Compared early-VAE and Late-VAE with non-VAE in patients with sepsis.<br><br>VAE rate per 1000 MV days not reported                                                                                               |
| Wolffers et al. (2021) An automated retrospective                                                                                                                                                                          | N=22,442 MV admissions (37,221 ventilator days)<br>592 VAE<br>194 IVAC                                                                                                                                                                                     | Modified                   | X   | X   | X    |      | No                       | Model Tested                       | Not reported                                                                               | VAE rate 15.9 per 1000 MV days (95% CI, 14.7—17.2).                                                                                                                                                                                                                 | Yes                            | Study aim was to create and evaluate an automated VAE surveillance program.                                                                                                                                       |

| Citation                                                                                                                                                             | Sample Method Years                                                                                                                    | 2013/2017 HNSN Definitions | VAE | VAC | IVAC | PVAP | VAP 2008 HNSN Definition | Measured outcomes                                 | Severity of illness score   | Results                                                                                            | Data-Driven Surveillance Model | Comments                                                                                                                                                                  |
|----------------------------------------------------------------------------------------------------------------------------------------------------------------------|----------------------------------------------------------------------------------------------------------------------------------------|----------------------------|-----|-----|------|------|--------------------------|---------------------------------------------------|-----------------------------|----------------------------------------------------------------------------------------------------|--------------------------------|---------------------------------------------------------------------------------------------------------------------------------------------------------------------------|
| VAE-surveillance tool for future quality improvement studies. <i>Sci Rep.</i> 2021;15;11(1):22264.                                                                   | Retrospective Years 2008-2916 (Switzerland)                                                                                            |                            |     |     |      |      |                          |                                                   |                             | VAE rate: 10.1–22.1 per 1000 MV days depending on the year (2008-2016). Mortality not reported     |                                | All ICU patients with MV were included to develop the model (median MV was 1 day). Three different sub-samples were used to test the model. Included manual surveillance. |
| Wu et al (2020) Prevalence, Clinical Characteristics, and Outcomes Related to VAE Events in Neurocritically Ill Patients. <i>Neurocrit Care.</i> 2020;33(2):499-507. | Neurocritical care N=855 ≥ 3 days MV. 147 VAE in 130 patients. 85 VAC 33 IVAC 29 VAP Retrospective Single Center (USA) Years 2014-2018 | Modified                   | X   | X   | X    | X    | No                       | Mortality VAE LOS-ICU                             | Glasgow Coma Scale (GCS)    | VAE rate: 13/1000 MV days. VAE prolonged MV and ICU-LOS but did not increase in-patient mortality. | No                             | VAE trigger event 84% increase in PEEP 16% increase in FIO2                                                                                                               |
| Meagher et al. (2019) VAE not VAP Is Associated with Higher Mortality in Trauma Patients. <i>J Trauma Acute Care Surg.</i> 2019;87(2):307-314.                       | Trauma non-head injury with ≥ 3 days MV: N=1,537 total 124 VAE 114 VAP 63 VAE & VAP Retrospective Single Center (USA) Years: 2012-2017 | Modified                   | X   |     |      |      | Yes                      | Mortality VAE VAP LOS-ICU LOS-Hosp Discharge home | Injury Severity Score (ISS) | Trauma patients have higher mortality with VAE than VAP                                            | No                             | Data from hospital trauma registry and VAE registry.<br><br>VAE rate per 1000 MV days not reported.<br><br>Days of MV are below the ≥ 4 days NHSN threshold.              |
| Shenoy et al. (2018) Real-Time, Automated Detection of Ventilator-                                                                                                   | Two ICU Cohorts <u>Development cohort</u> 1,325 ICU admissions 479 MV patients 2,539 MV days                                           | Yes                        | X   | X   | X    | X    | No                       | FIO2 change PEEP change LOS                       | Not Reported                | <u>Development Cohort:</u> For_manual surveillance sensitivity 40%, specificity 89%, PPV 70%.      | Yes                            | Aim was to develop and validate an algorithm model to detect VAE in real time from the EHR                                                                                |

| Citation                                                                                                                                                       | Sample Method Years                                                                                                                                                                                                                                  | 2013/2017 HNSN Definitions | VAE | VAC | IVAC | PVAP | VAP 2008 HNSN Definition | Measured outcomes                                          | Severity of illness score   | Results                                                                                                                                                                                                                                                     | Data-Driven Surveillance Model | Comments                                                                                                                                                                                                                                                                                                                  |
|----------------------------------------------------------------------------------------------------------------------------------------------------------------|------------------------------------------------------------------------------------------------------------------------------------------------------------------------------------------------------------------------------------------------------|----------------------------|-----|-----|------|------|--------------------------|------------------------------------------------------------|-----------------------------|-------------------------------------------------------------------------------------------------------------------------------------------------------------------------------------------------------------------------------------------------------------|--------------------------------|---------------------------------------------------------------------------------------------------------------------------------------------------------------------------------------------------------------------------------------------------------------------------------------------------------------------------|
| Associated Events: Avoiding Missed Detections, Misclassifications, and False Detections Due to Human Error. 2018;39(7):826-833.                                | 47 VAE<br>28 VAC<br>12 IVAC<br>7 PVAC<br>Year: Jan-March 2015<br><u>Validation cohort</u><br>1,234 ICU admissions<br>431 MV patients<br>2,604 MV days<br>56 VAE<br>44 VAC<br>12 IVAC<br>0 PVAP<br>Year: Jan-March 2016<br>Single Center 4 ICUs (USA) |                            |     |     |      |      |                          | VAE                                                        |                             | For automated surveillance sensitivity 100%, specificity 100% PPV 100%.<br><br><u>Validation Cohort:</u><br>For manual surveillance sensitivity 71%, specificity 98% PPV 100%.<br><br>For automated surveillance sensitivity 85%, specificity 99% PPV 100%. |                                | using the NHSN 2017 definition.<br>Compared manual and automated surveillance methods in two cohorts.<br><u>Development Cohort MV:</u><br>1.9 MV days (median)<br><u>Validation Cohort MV:</u><br>2.2 MV days (median)<br><br>Number of patients with MV ≥ 4 days not reported<br>VAE rate per 1000 MV days not reported. |
| Younan et al. (2017) Trauma patients meeting both CDC definitions for VAP had worse outcomes than those meeting only one. <i>J Surg Res.</i> 2017;216:123-128. | Trauma ≥ 2 days MV:<br>N=1,165 total:<br>78 PVAP<br>361 VAP<br>68 PVAP & VAP.<br>Retrospective<br>Single Center (USA)<br>Years: 2013-2014                                                                                                            | Modified                   |     |     |      | X    | Yes                      | Mortality<br>PVAC<br>VAP<br>LOS-ICU<br>LOS-Hosp<br>MV days | Injury Severity Score (ISS) | Longer LOS if patients met both PVAC & VAP criteria.<br>No difference in mortality between patients with PVAC versus VAP                                                                                                                                    | No                             | Aim was to compare two NHSN definitions for VAP and PVAP.<br><br>VAE rate per 1000 MV days not reported.<br><br>Days of MV are below the > 4 days NHSN threshold.                                                                                                                                                         |
| Magill et al. (2016) Incidence and Characteristics of Ventilator-Associated Events Reported to the National Healthcare                                         | 1,824 adult healthcare facilities reported 32,772 months of VAE surveillance data to NHSN.<br>19,676 VAE<br>12,474 VAC                                                                                                                               | Yes                        | X   | X   | X    | X    | No                       | Mortality<br>VAC<br>IVAC<br>PVAC                           | Not Reported                | In critical care units the highest VAE pooled mean rates per 1,000 MV days were trauma (11.79) and neurology (8.92).                                                                                                                                        | No                             | First national report of VAE rates.<br>Comprehensive table of pooled mean for multiple types of VAE by location (Table 1).                                                                                                                                                                                                |

| Citation                                                                                                                                                                                                    | Sample Method Years                                                                                                                                                 | 2013/2017 HNSN Definitions | VAE | VAC | IVAC | PVAP | VAP 2008 HNSN Definition | Measured outcomes                             | Severity of illness score | Results                                                                                                                                                                                                                                                       | Data-Driven Surveillance Model | Comments                                                                                                                                                               |
|-------------------------------------------------------------------------------------------------------------------------------------------------------------------------------------------------------------|---------------------------------------------------------------------------------------------------------------------------------------------------------------------|----------------------------|-----|-----|------|------|--------------------------|-----------------------------------------------|---------------------------|---------------------------------------------------------------------------------------------------------------------------------------------------------------------------------------------------------------------------------------------------------------|--------------------------------|------------------------------------------------------------------------------------------------------------------------------------------------------------------------|
| Safety Network in 2014. <i>Crit Care Med.</i> 2016;44(12):2154-2162.                                                                                                                                        | 4,002 IVAC<br>3,200 PVAP<br>Multicenter (USA)<br>Year: 2014 – May 2015                                                                                              |                            |     |     |      |      |                          |                                               |                           |                                                                                                                                                                                                                                                               |                                |                                                                                                                                                                        |
| Bouadma et al. (2015) Ventilator Associated Events: Prevalence, Outcome, and Relationship with VAP. <i>Crit Care Med.</i> 2015;43(9):1798-1806.                                                             | ICU ≥ 5 days MV<br>N=3,028 total<br>2,331 VAC<br>869 IVAC<br>Years: 1996-2012<br>Retrospective, Multicenter (France)                                                | Modified                   |     | X   | X    |      | Yes                      | Mortality<br>LOS-ICU<br>MV Days               | SOFA<br>SAPS II<br>GCS    | VAC Rate: 107 per 1000 MV days.<br>IVAC Rate: 35 per 1000 MV days.<br>Rates and incidence were similar across all ICUs<br>VAE and VAC are a frequent occurrence in the ICU                                                                                    | No                             | Practice changes for PEEP and FIO2 were based on P/F ratio which differs from the CDC criteria. Data obtained from French multicenter OUTCOMEREA database (1996-2012). |
| Kobayashi et al. (2017) The Impact of VAE in Critically Ill Subjects with Prolonged MV. <i>Respir Care.</i> 2017;62(11):1379-1386.                                                                          | ICU ≥ 4 days MV<br>N=404 total<br>54 VAC<br>23 IVAC<br>20 VAP<br>Retrospective<br>Single Center (Japan)<br>Years: 2010-2013                                         | Yes                        |     | X   | X    |      | Yes                      | Mortality<br>LOS-ICU<br>LOS-Hosp<br>Vent days | APACHE II (IQR)           | IVAC associated with higher hospital mortality than VAP                                                                                                                                                                                                       | No                             | VAE rate per 1000 MV days not reported.                                                                                                                                |
| Klouwenberg et al. (2014) Electronic Implementation of a Novel Surveillance Paradigm for Ventilator-associated Events: Feasibility and Validation. <i>Am J Respir Crit Care Med.</i> 2014 15;189(8):947-55. | N=2080 ICU MV pts.<br>158 VAC<br>66 IVAC<br>51 PVAP<br>127 VAP (prior criteria)<br>Prospective Cohort.<br>Multicenter (Netherlands)<br>Years: Jan 2011-to-July 2012 | Yes                        | X   | X   | X    |      | Yes                      | Mortality<br>VAE<br>VAP                       |                           | VAC Rate: VAE rate per 1000 MV days not reported.<br><br>Most VACs were identified by a PEEP increase.<br>All types of VAE and VAP increased mortality.<br><br>The VAE algorithm detected at most 32% of VAP that was identified by prospective surveillance. | Yes                            |                                                                                                                                                                        |

| Citation                                                                                                                                                                                               | Sample Method Years                                                                                                                                                                                                                                                   | 2013/2017 HNSN Definitions | VAE | VAC | IVAC | PVAP | VAP 2008 HNSN Definition | Measured outcomes                                                | Severity of illness score | Results                                                                                                                                                                                      | Data-Driven Surveillance Model | Comments                                                                                                                                                                                                       |
|--------------------------------------------------------------------------------------------------------------------------------------------------------------------------------------------------------|-----------------------------------------------------------------------------------------------------------------------------------------------------------------------------------------------------------------------------------------------------------------------|----------------------------|-----|-----|------|------|--------------------------|------------------------------------------------------------------|---------------------------|----------------------------------------------------------------------------------------------------------------------------------------------------------------------------------------------|--------------------------------|----------------------------------------------------------------------------------------------------------------------------------------------------------------------------------------------------------------|
|                                                                                                                                                                                                        |                                                                                                                                                                                                                                                                       |                            |     |     |      |      |                          |                                                                  |                           |                                                                                                                                                                                              |                                |                                                                                                                                                                                                                |
| Ramírez-Estrada et al. (2018) Assessing predictive accuracy for outcomes of ventilator-associated events in an international cohort: the EUVAE study. <i>Intensive Care Med.</i> 2018;44(8):1212-1220. | ICU pts ≥ 2 days MV: N=244 total<br>117 (VAE)<br>4 (VAC)<br>113 (IVAC)<br>64 (PVAP)<br>33 (VAP)<br>51 (VAT)<br>Prospective Cohort<br>Multicenter 13 ICUs in multiple countries. (Australia, France, Greece, Iran, Italy, Slovenia, Spain, Turkey)<br>Years: not given | Modified                   | X   | X   | X    |      | Yes                      | Mortality<br>LOS-ICU<br>LOS-Hosp                                 | APACHE II                 | ICU mortality higher in patients with VAT than VAP                                                                                                                                           | No                             | Cites the CDC criteria but uses alternative definitions ie: VAT & VARI. Notes new CDC criteria miss VAEs that occur without oxygenation deficits. Same research-group as Bouadma et al. (2015) in table above. |
| Pouly et al. (2020) Accuracy of VAE for the diagnosis of ventilator-associated lower respiratory tract infections (VA-LRTI). <i>Ann Intensive Care.</i> 2020;10(1):6.                                  | ICU ≥ 5 days MV: N=189 Years: not given<br>6 MV Patients<br>15,029 MV Days<br>227 (VAE)<br>227 (VAC)<br>123 (IVAC)<br>62 (PVAP)<br>99 (VAT)<br>215 (VAP)<br>314 (VA-LRTI)<br>Prospective<br>Single Center                                                             | Yes                        | X   | X   | X    | X    | Yes                      | Mortality<br>VAE<br>VAT<br>VAP<br>LOS-ICU<br>LOS-Hosp<br>MV Days | SOFA<br>SAPS II           | VAE Rate: 17.4 per 1000 MV Days<br>VAT Rate: 8.5 per 1000 MV Days<br>VAP Rate: 17.8 per 1000 MV Days<br><br>Poor agreement between VAE & VAP<br><br>No difference in mortality across groups | No                             | Aim of study was to examine concordance between VAE and lower respiratory tract VAP.<br><br>incidence numbers listed are from the Flow diagram, Figure 1.                                                      |

[illegible]

**eTable 2. Inclusion/exclusion criteria and limitations**

| inclusion                                                                                                                              | exclusion                                                                                                                                                                                          |
|----------------------------------------------------------------------------------------------------------------------------------------|----------------------------------------------------------------------------------------------------------------------------------------------------------------------------------------------------|
| <ul style="list-style-type: none"><li>• ICU stay <math>\geq</math> 4 days</li><li>• MV <math>\geq</math> 4 days, consecutive</li></ul> | <ul style="list-style-type: none"><li>• missing <math>\geq</math> 1 day data on PEEP, FiO<sub>2</sub></li><li>• age &lt; 18</li><li>• subsequent episodes of MV within the same ICU stay</li></ul> |

16.5% (n=1,344) of patients in the eICU-CRD database and 19.7% (n=1,632) of patients in the MIMIC-III database had multiple instances of MV during a single ICU stay and those subsequent episodes were excluded from the analyses so that each episode of MV was in the ICU stay only once.

## eFigures

## eFigure 1. VAE criteria, including VAC, IVAC, PVAP

The VAE criteria build infection-related ventilator-associated complications (IVAC) and possible and probable VAP (PVAP) on top of the definition for the ventilator-associated complication (VAC). As such, IVAC is a subset of VAC, and PVAP is a subset of IVAC.

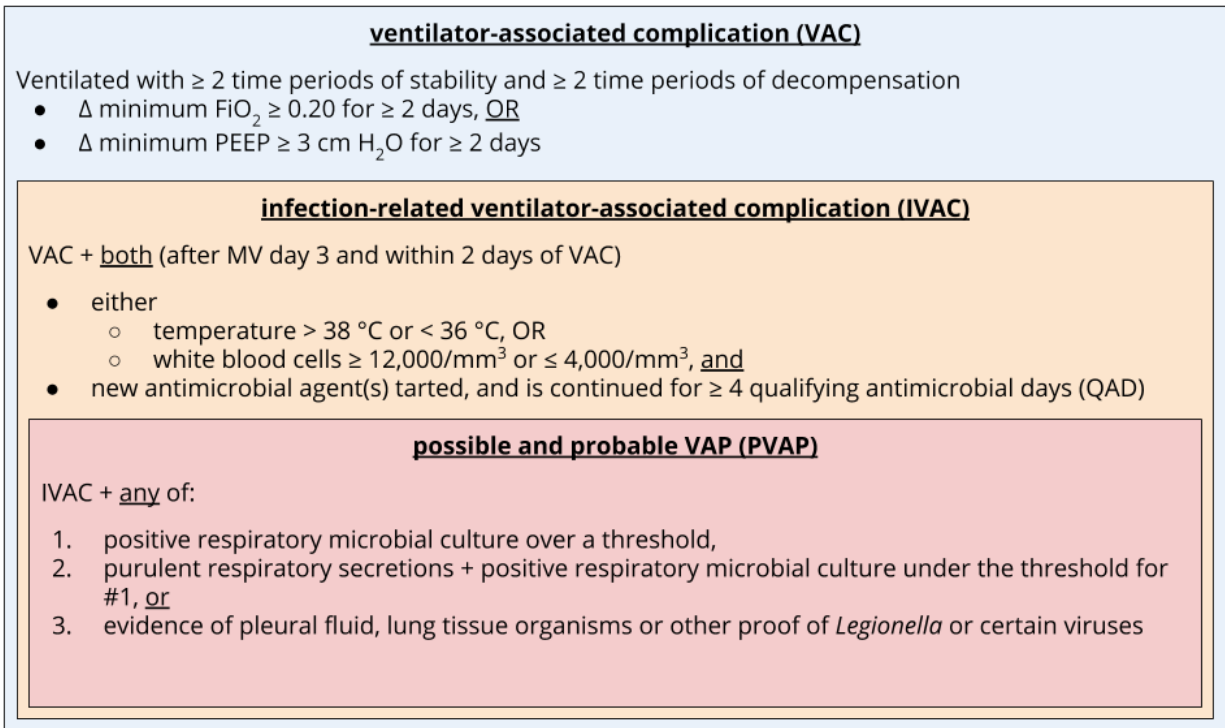

The VAC algorithm definition is explained in detail below.

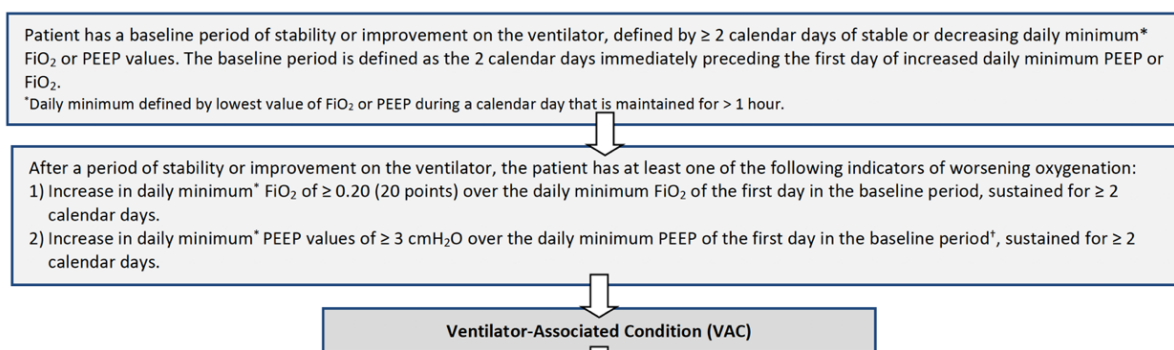

**eFigure 2. Different ventilator requirement scenarios.**

The red line indicates the completion of the stability period. Increasing bar height implies higher requirements, either of FiO<sub>2</sub> or PEEP.

**eFigure 2a.** Classic example of VAC

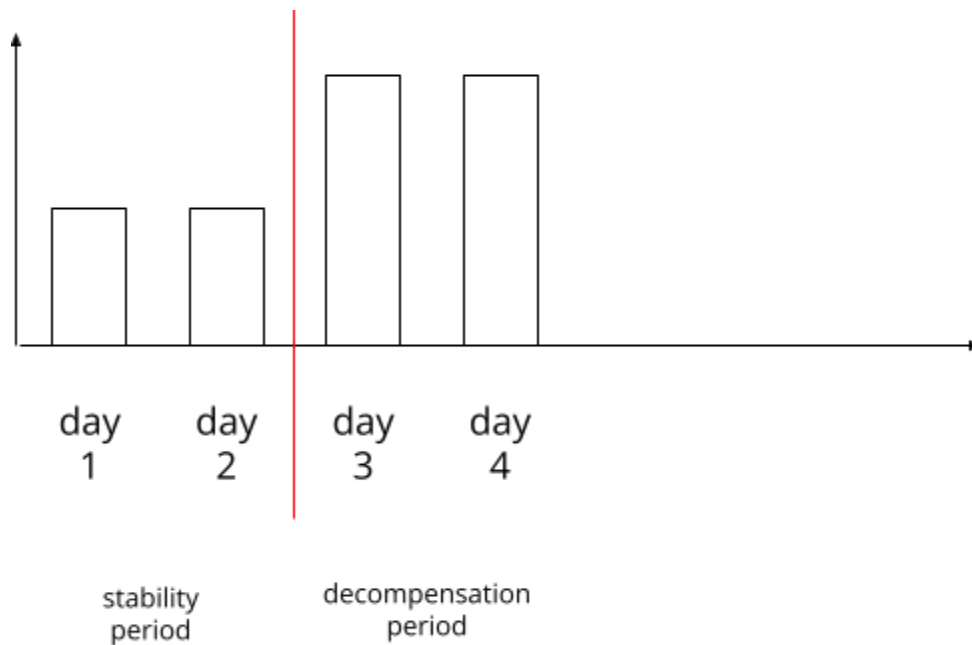

**eFigure 2b.** By this situation, this would be defined as a VAC if  $\Delta \text{minFiO}_2$  is  $\leq 50\%$ . For  $\Delta \text{minFiO}_2 > 50\%$ , this situation by definition cannot be defined as a VAC by  $\Delta \text{minFiO}_2$  criteria, as the resultant  $\text{minFiO}_2$  cannot surpass 100%.

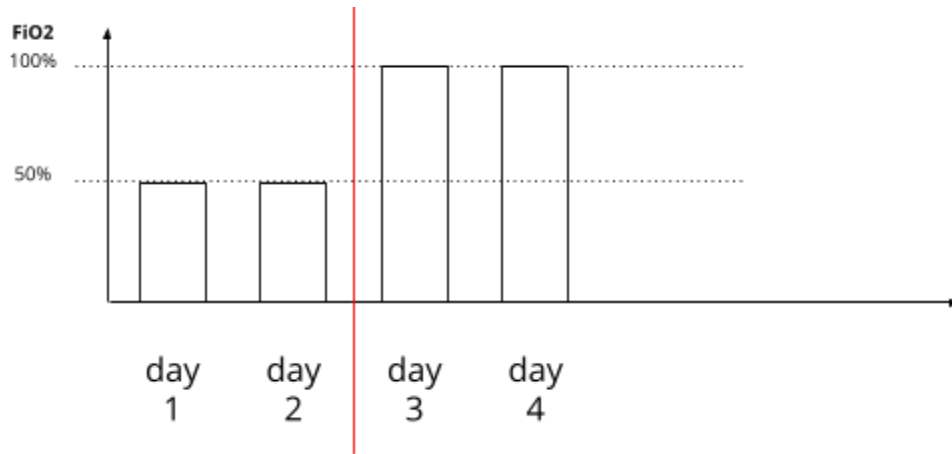

**eFigure 2c.** Would not satisfy stability requirement

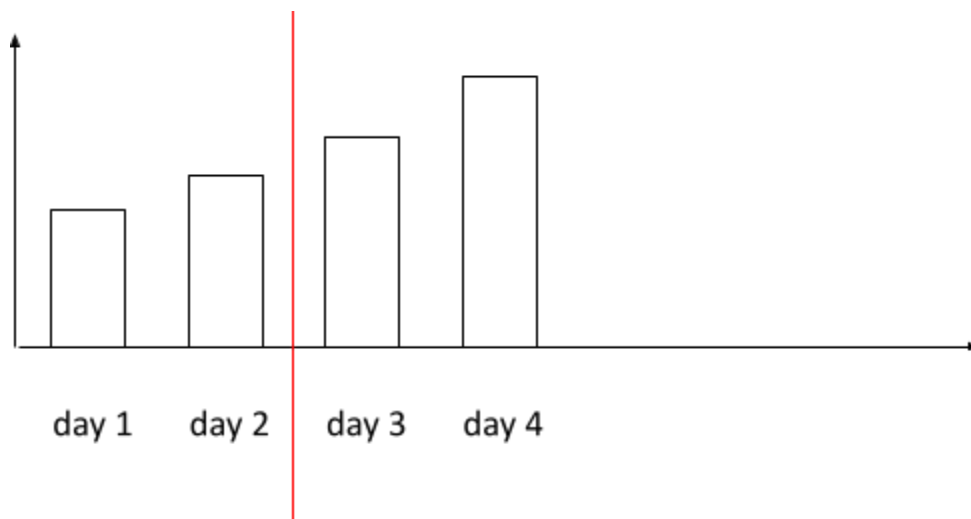

**Supplemental Figure 2d. Died too early**

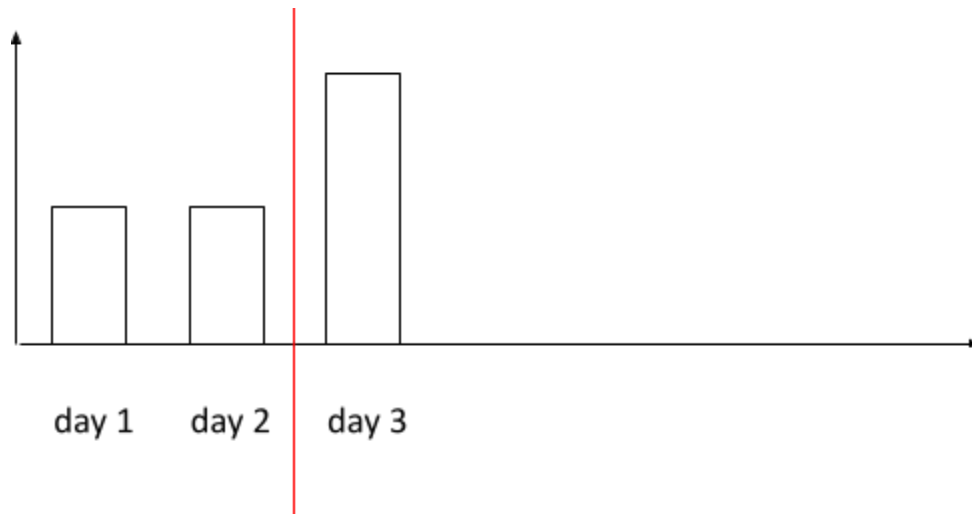

**Supplemental Figure 2e. New event too soon**

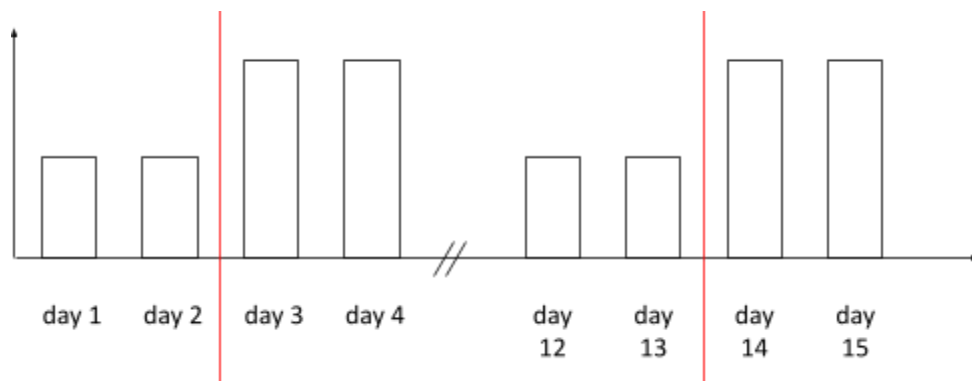

**eFigure 3. Difference between calendar day and 24-hour time intervals.**

**eFigure 3a.** Comparing calendar day notation versus 24-hour periods. In this example, this patient would have 4 calendar days but 3 sets of 24-hour time-intervals.

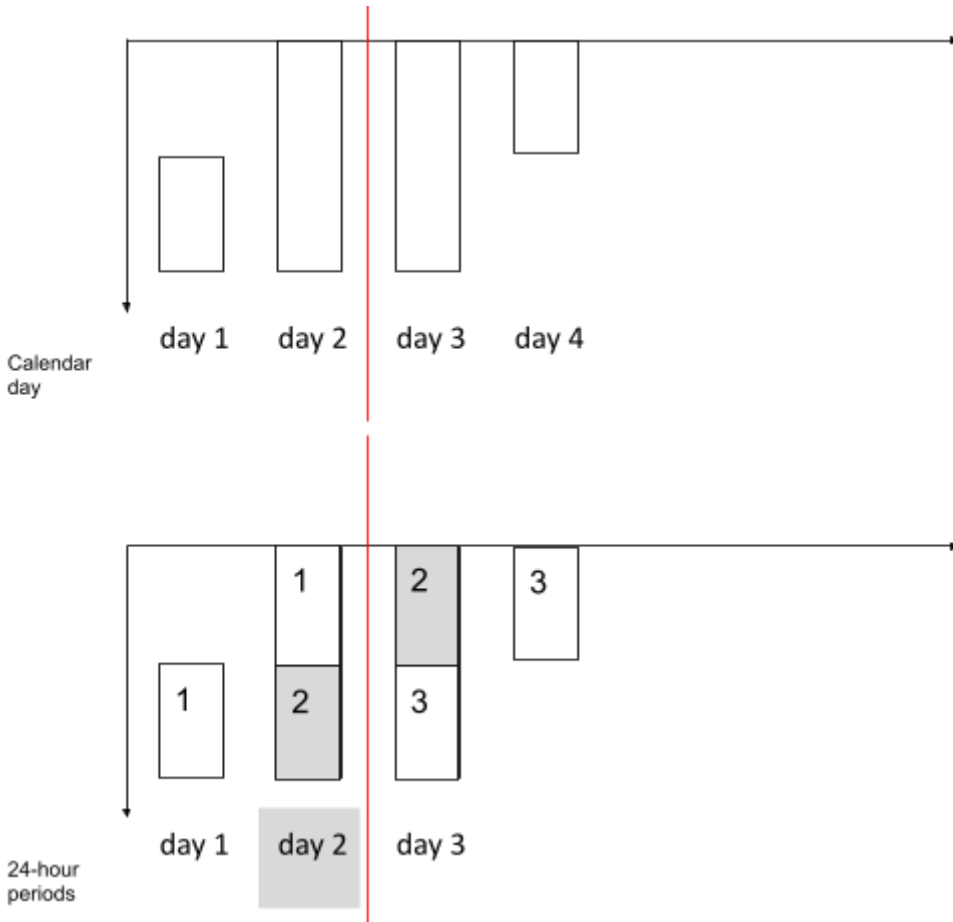

**eFigure 3b.** Comparing MV variability for 4 calendar days. Both the top figure (50 hours) and bottom figure (96 hours) are considered as having 4 calendar days of MV. However, only the bottom would qualify for 96 hours of MV.

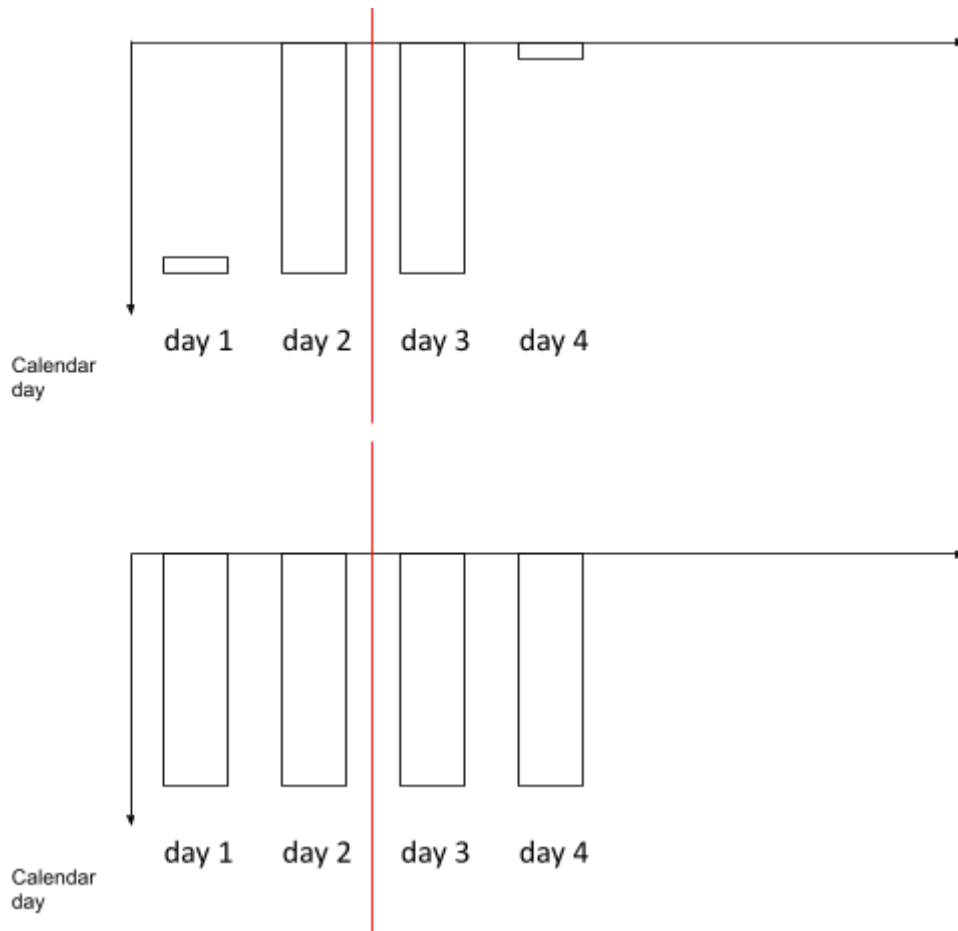

#### eFigure 4. Time definition between calendar days and 24-hour periods

The purple overlap includes most patients who fit both criteria (> 4 calendar days and > 96 hours of MV).

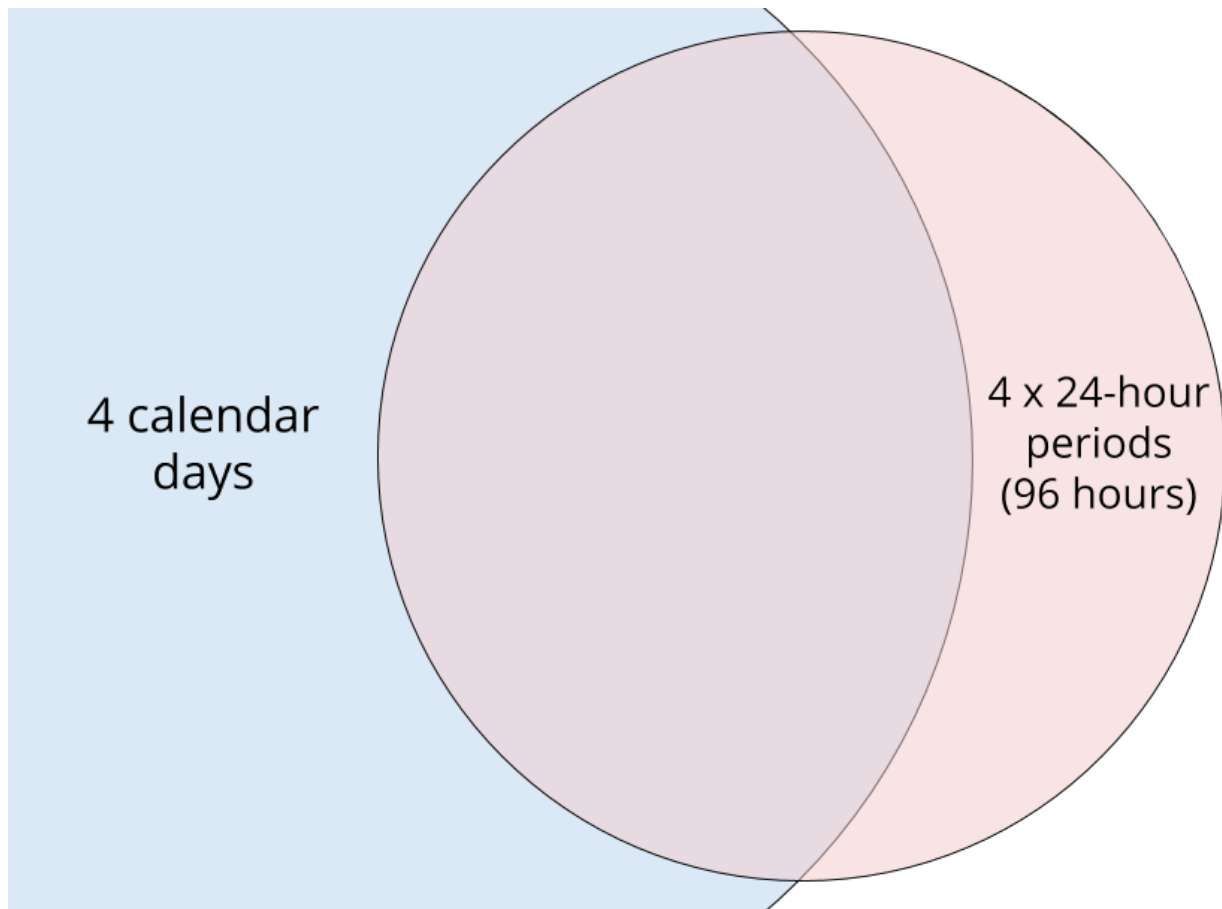

## eFigure 5. Additional examples of explorations

These examples present similar situations as those explored in the manuscript. However, screenshots from the interactive tool are also included for further context - both to describe settings and to illustrate the comparative tables generated for each example.

eFigure 5a. Using calendar day time intervals,  $\Delta\text{FiO}_2 \geq 40\%$ ,  $\Delta\text{minPEEP} \geq 3$ .

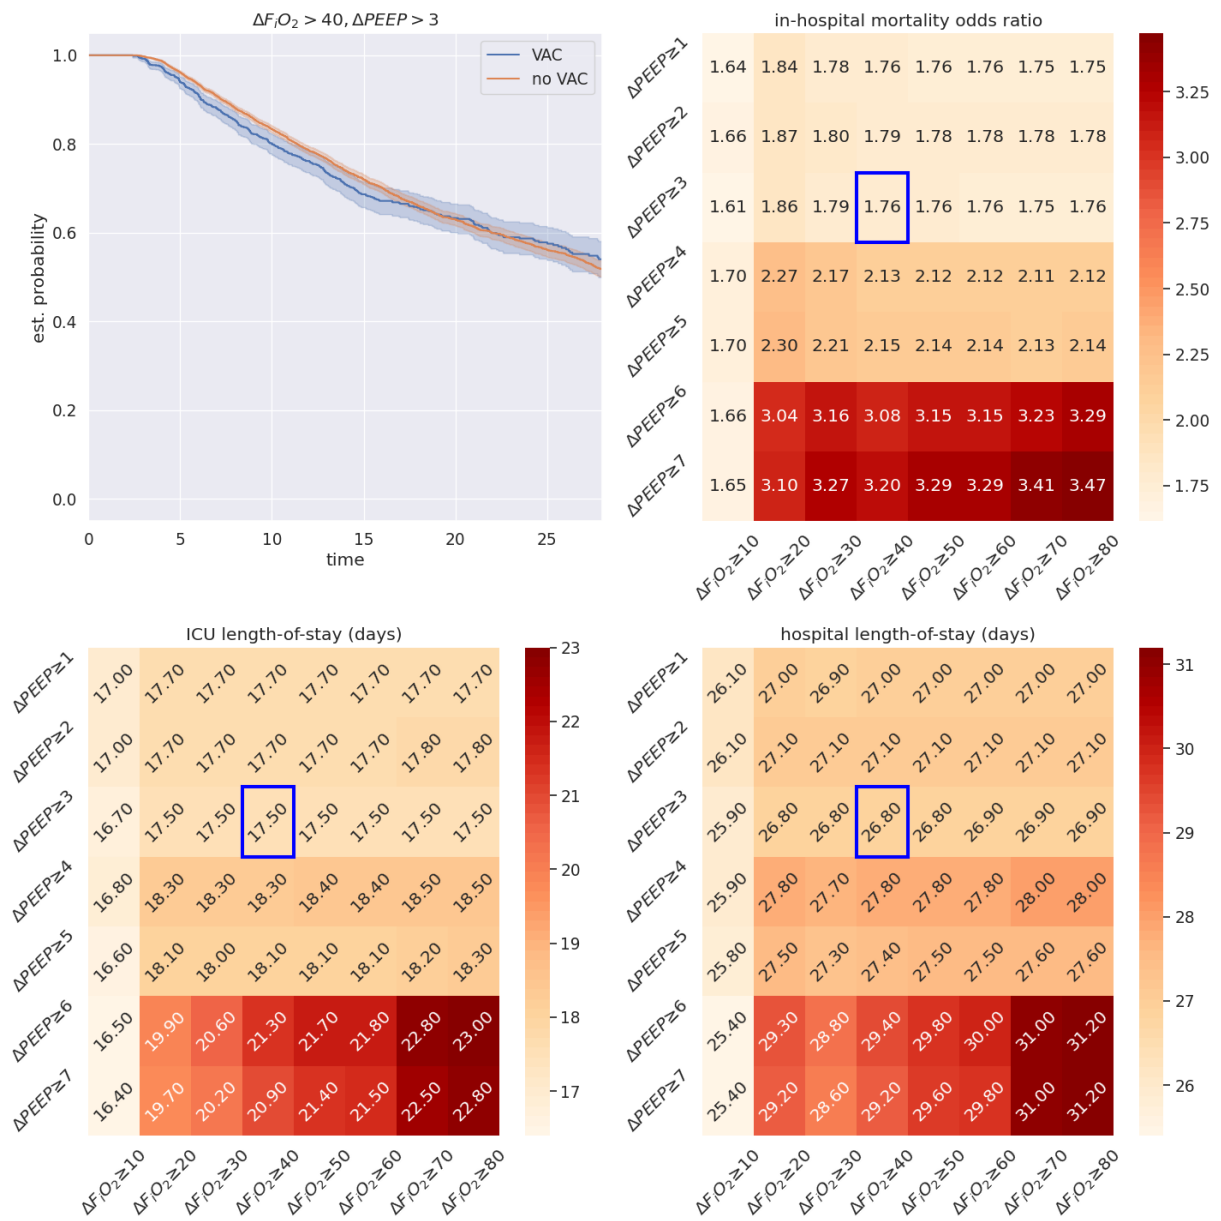

dataset(s):

all

time definiti...

calendar day

$\Delta min F_i O_2 >$

40

$\Delta min PEEP$

3

VAC timing

any

ICU type(s):

all

rSOFA

any

event: in-hospital mortality

|                    | VAC       | no VAC     | all        |
|--------------------|-----------|------------|------------|
| n                  | 1,261     | 13,256     | 14,517     |
| # vent days        | 14,521.00 | 102,902.00 | 117,423.00 |
| VAC/1000 vent days |           |            | 10.74      |
| # events           | 422       | 2929       | 3351       |
| event rate         | 33.47%    | 22.10%     | 23.08%     |

.....

Comparison between patients with a VAC (+) and without a VAC (-), with stratifications by in-hospital mortality

|   | column-value                          | count (VAC) | % (VAC) | count (no VAC) | % (no VAC) | count (all) | mean $\pm$ std (VAC) | mean $\pm$ std (no VAC) | p        | statistic | mean $\pm$ std (both) | median (VAC) | median (no VAC) |
|---|---------------------------------------|-------------|---------|----------------|------------|-------------|----------------------|-------------------------|----------|-----------|-----------------------|--------------|-----------------|
| 0 | All-raw                               | 1261.0      | 8.69%   | 13256.0        | 91.31%     | 14517.0     |                      |                         |          |           |                       |              |                 |
| 1 | ==( los-hospital: survivors )==       | 836.0       | 100.0%  | 10244.0        | 100.0%     |             | (VAC)                | (no VAC)                |          |           |                       | (VAC)        | (no VAC)        |
| 2 | los-hospital                          |             |         |                |            |             | 26.84 $\pm$ 18.31    | 21.09 $\pm$ 17.34       | 1.69e-35 | 5387805.0 | 21.52 $\pm$ 17.48     | 22.46        | 16.9            |
| 3 | ==( los-hospital: non – survivors )== | 422.0       | 100.0%  | 2929.0         | 100.0%     |             | (VAC)                | (no VAC)                |          |           |                       | (VAC)        | (no VAC)        |
| 4 | los-hospital                          |             |         |                |            |             | 16.28 $\pm$ 15.0     | 17.1 $\pm$ 17.3         | 0.1147   | 588710.5  | 17.0 $\pm$ 17.03      | 11.5         | 12.38           |
| 5 | ==( los-icu: survivors )==            | 836.0       | 100.0%  | 10244.0        | 100.0%     |             | (VAC)                | (no VAC)                |          |           |                       | (VAC)        | (no VAC)        |
| 6 | los-icu                               |             |         |                |            |             | 17.47 $\pm$ 11.58    | 11.83 $\pm$ 9.11        | 5.03e-82 | 5987982.0 | 12.26 $\pm$ 9.44      | 14.08        | 9.03            |
| 7 | ==( los-icu: non – survivors )==      | 422.0       | 100.0%  | 2929.0         | 100.0%     |             | (VAC)                | (no VAC)                |          |           |                       | (VAC)        | (no VAC)        |
| 8 | los-icu                               |             |         |                |            |             | 12.07 $\pm$ 10.05    | 11.54 $\pm$ 9.92        | 0.594    | 627923.0  | 11.61 $\pm$ 9.94      | 8.89         | 8.79            |

eFigure 5b. Using 24 hour time intervals,  $\Delta minFiO_2 \geq 20\%$ ,  $\Delta minPEEP \geq 3$ .

Note that the total number of patients has changed from 14,517 to 10,436.

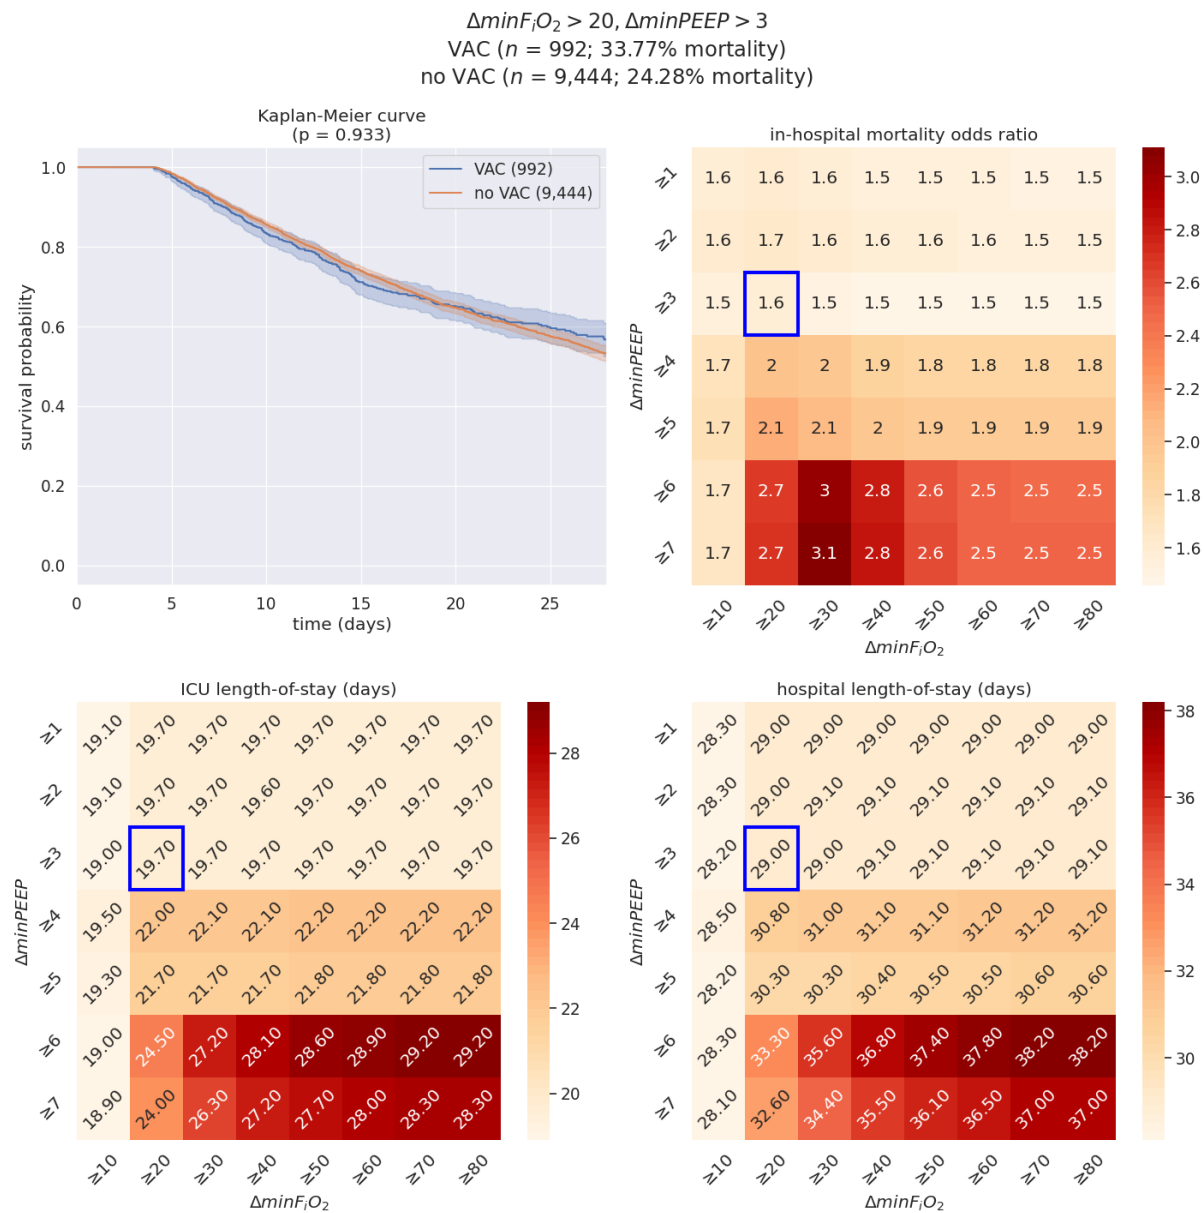

dataset(s): 

all

time definiti...

24hr day

$\Delta minF_iO_2 >$ 

20

$\Delta minPEEP$ 

3

VAC timing

any

ICU type(s):

all

rSOFA

any

event: in-hospital mortality

|                    | VAC       | no VAC    | all       |
|--------------------|-----------|-----------|-----------|
| n                  | 992       | 9,444     | 10,436    |
| # vent days        | 12,250.16 | 81,353.74 | 93,603.90 |
| VAC/1000 vent days |           |           | 10.60     |
| # events           | 335       | 2293      | 2628      |
| event rate         | 33.77%    | 24.28%    | 25.18%    |

Comparison between patients with a VAC (+) and without a VAC (-), with stratifications by in-hospital mortality

|   | column-value                          | count (VAC) | % (VAC) | count (no VAC) | % (no VAC) | count (all) | mean $\pm$ std (VAC) | mean $\pm$ std (no VAC) | p        | statistic | mean $\pm$ std (both) | median (VAC) | median (no VAC) |
|---|---------------------------------------|-------------|---------|----------------|------------|-------------|----------------------|-------------------------|----------|-----------|-----------------------|--------------|-----------------|
| 0 | All-raw                               | 992.0       | 9.51%   | 9444.0         | 90.49%     | 10436.0     |                      |                         |          |           |                       |              |                 |
| 1 | ==( los-hospital: survivors )==       | 654.0       | 100.0%  | 7088.0         | 100.0%     |             | (VAC)                | (no VAC)                |          |           |                       | (VAC)        | (no VAC)        |
| 2 | los-hospital                          |             |         |                |            |             | 28.99 $\pm$ 17.9     | 23.25 $\pm$ 17.33       | 4.22e-27 | 2907411.5 | 23.73 $\pm$ 17.45     | 24.37        | 18.96           |
| 3 | ==( los-hospital: non - survivors )== | 335.0       | 100.0%  | 2293.0         | 100.0%     |             | (VAC)                | (no VAC)                |          |           |                       | (VAC)        | (no VAC)        |
| 4 | los-hospital                          |             |         |                |            |             | 17.5 $\pm$ 14.06     | 18.27 $\pm$ 17.99       | 0.5554   | 376428.0  | 18.18 $\pm$ 17.54     | 13.07        | 13.24           |
| 5 | ==( los-icu: survivors )==            | 654.0       | 100.0%  | 7088.0         | 100.0%     |             | (VAC)                | (no VAC)                |          |           |                       | (VAC)        | (no VAC)        |
| 6 | los-icu                               |             |         |                |            |             | 19.72 $\pm$ 12.12    | 13.89 $\pm$ 9.56        | 5.46e-55 | 3171956.0 | 14.38 $\pm$ 9.94      | 16.38        | 11.06           |
| 7 | ==( los-icu: non - survivors )==      | 335.0       | 100.0%  | 2293.0         | 100.0%     |             | (VAC)                | (no VAC)                |          |           |                       | (VAC)        | (no VAC)        |
| 8 | los-icu                               |             |         |                |            |             | 13.51 $\pm$ 9.83     | 12.74 $\pm$ 10.4        | 0.1071   | 404981.5  | 12.84 $\pm$ 10.33     | 10.66        | 9.96            |

eFigure 5c. Using CDC VAC criteria ( $\Delta\text{minFiO}_2 \geq 20\%$ ,  $\Delta\text{minPEEP} \geq 3$ , calendar day time intervals) for late VAC (VAC developed on day 7 or later)

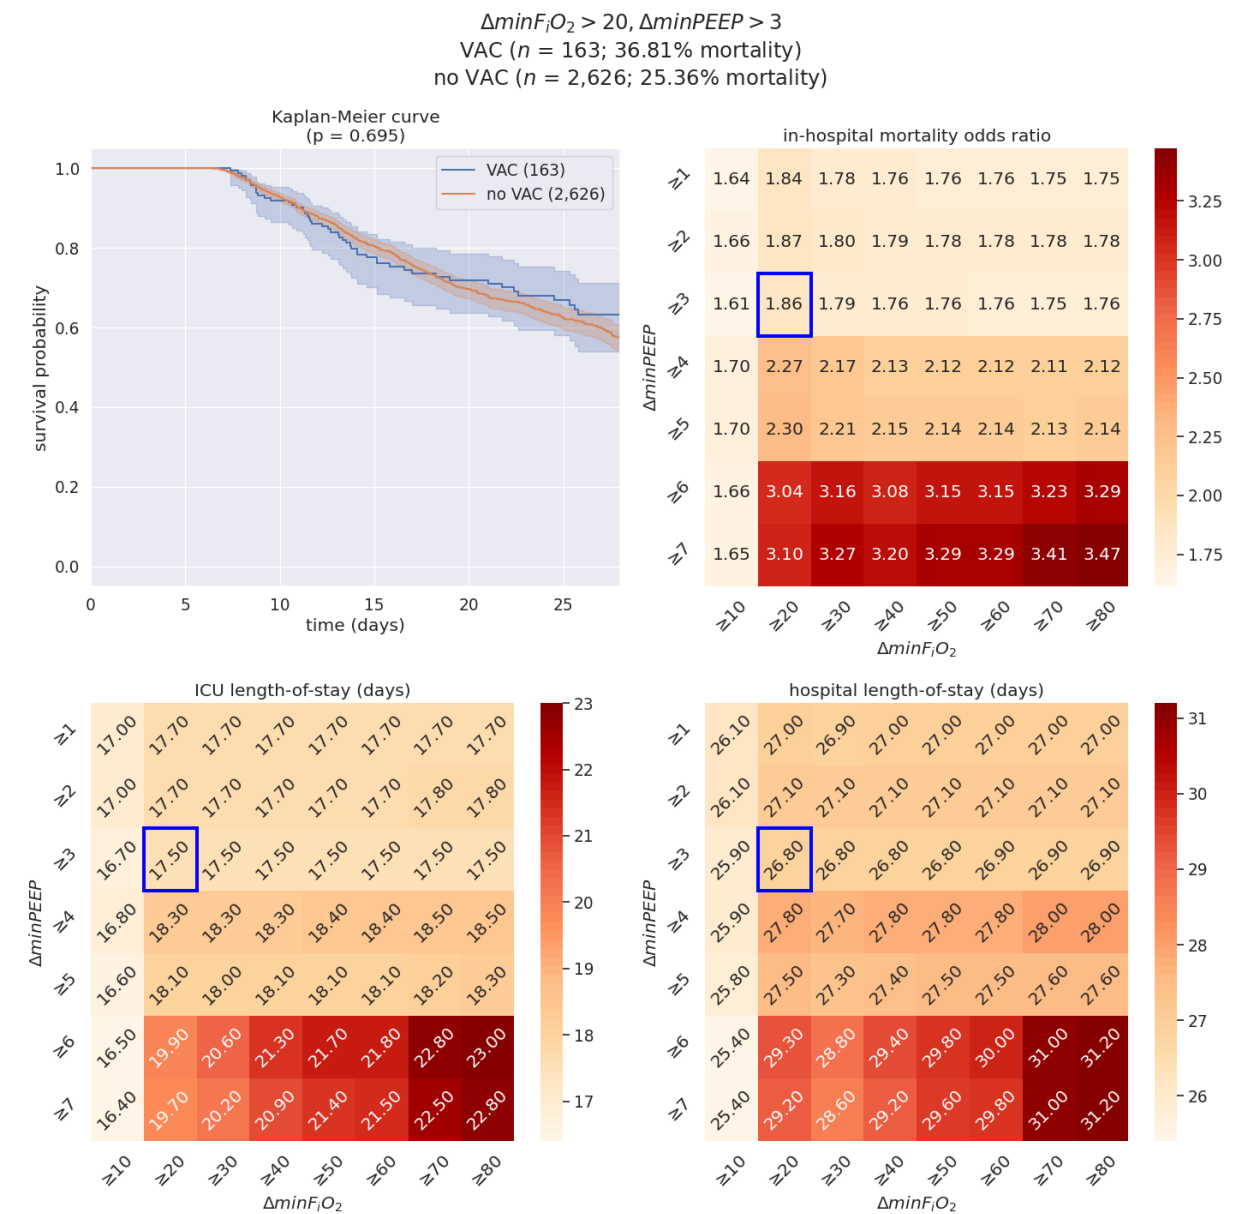

dataset(s): 

all

time definiti...

calendar day

$\Delta min FiO_2 >$ 

20

$\Delta min PEEP$ 

3

VAC timing 

>=7d

ICU type(s): 

all

rSOFA 

any

event: in-hospital mortality

|                    | VAC      | no VAC    | all       |
|--------------------|----------|-----------|-----------|
| n                  | 163      | 2,626     | 2,789     |
| # vent days        | 2,743.00 | 30,882.00 | 33,625.00 |
| VAC/1000 vent days |          |           | 4.85      |
| # events           | 60       | 666       | 726       |
| event rate         | 36.81%   | 25.36%    | 26.03%    |

|   | column-value                          | count (VAC) | % (VAC) | count (no VAC) | % (no VAC) | count (all) | mean $\pm$ std (VAC) | mean $\pm$ std (no VAC) | p        | statistic | mean $\pm$ std (both) | median (VAC) | median (no VAC) |
|---|---------------------------------------|-------------|---------|----------------|------------|-------------|----------------------|-------------------------|----------|-----------|-----------------------|--------------|-----------------|
| 0 | All-row                               | 163.0       | 5.84%   | 2626.0         | 94.16%     | 2789.0      |                      |                         |          |           |                       |              |                 |
| 1 | ==( los-hospital: survivors )==       | 103.0       | 100.0%  | 1934.0         | 100.0%     |             | (VAC)                | (no VAC)                |          |           |                       | (VAC)        | (no VAC)        |
| 2 | los-hospital                          |             |         |                |            |             | 33.58 $\pm$ 17.3     | 27.29 $\pm$ 18.81       | 4.52e-07 | 128949.0  | 27.6 $\pm$ 18.79      | 29.82        | 22.27           |
| 3 | ==( los-hospital: non — survivors )== | 60.0        | 100.0%  | 666.0          | 100.0%     |             | (VAC)                | (no VAC)                |          |           |                       | (VAC)        | (no VAC)        |
| 4 | los-hospital                          |             |         |                |            |             | 22.33 $\pm$ 15.84    | 23.35 $\pm$ 20.32       | 0.6098   | 19185.5   | 23.27 $\pm$ 19.98     | 15.47        | 17.39           |
| 5 | ==( los-icu: survivors )==            | 103.0       | 100.0%  | 1934.0         | 100.0%     |             | (VAC)                | (no VAC)                |          |           |                       | (VAC)        | (no VAC)        |
| 6 | los-icu                               |             |         |                |            |             | 24.76 $\pm$ 13.11    | 17.13 $\pm$ 10.43       | 2.56e-13 | 142151.5  | 17.52 $\pm$ 10.71     | 22.56        | 13.97           |
| 7 | ==( los-icu: non — survivors )==      | 60.0        | 100.0%  | 666.0          | 100.0%     |             | (VAC)                | (no VAC)                |          |           |                       | (VAC)        | (no VAC)        |
| 8 | los-icu                               |             |         |                |            |             | 18.48 $\pm$ 11.87    | 16.63 $\pm$ 13.59       | 0.1944   | 21999.5   | 16.78 $\pm$ 13.46     | 13.75        | 13.25           |

eFigure 5d. Using CDC VAC criteria ( $\Delta\text{minFiO}_2 \geq 20\%$ ,  $\Delta\text{minPEEP} \geq 3$ , calendar day time intervals) for respiratory SOFA score  $\geq 3$  (implying P/F ratio  $< 200$ )

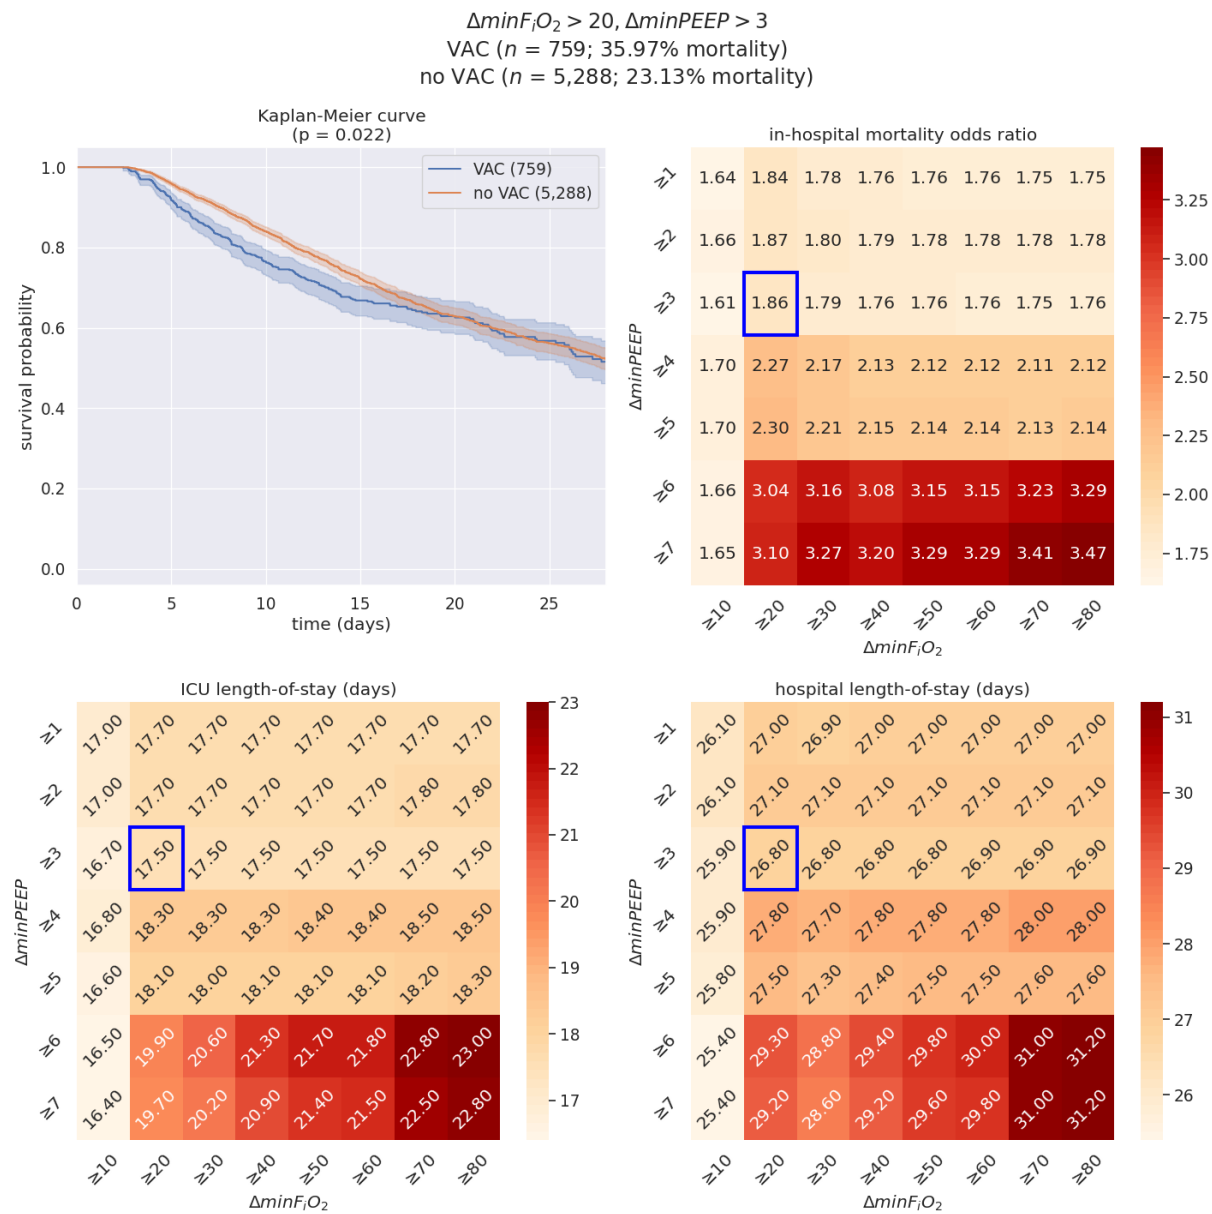

dataset(s):

all

time definiti...

calendar day

$\Delta min F_i O_2 >$

20

$\Delta min PEEP$

3

VAC timing

any

ICU type(s):

all

rSOFA

>=3

event: in-hospital mortality

VAC

no VAC

all

n

759

5,288

6,047

# vent days

8,679.00

42,533.00

51,212.00

VAC/1000 vent days

14.82

# events

273

1223

1496

event rate

35.97%

23.13%

24.74%

Comparison between patients with a VAC (+) and without a VAC (-), with stratifications by in-hospital mortality

column-value

count (VAC)

% (VAC)

count (no VAC)

% (no VAC)

count (all)

mean  $\pm$  std (VAC)

mean  $\pm$  std (no VAC)

p

statistic

mean  $\pm$  std (both)

median (VAC)

median (no VAC)

0

All-raw

759.0

12.55%

5288.0

87.45%

6047.0

1

==( los-hospital: survivors )==

484.0

100.0%

4034.0

100.0%

(VAC)

(no VAC)

(VAC)

(no VAC)

2

los-hospital

27.1  $\pm$  18.4

21.43  $\pm$  18.77

3.83e-23

1244903.5

22.04  $\pm$  18.81

22.98

17.09

3

==( los-hospital: non - survivors )==

273.0

100.0%

1223.0

100.0%

(VAC)

(no VAC)

(VAC)

(no VAC)

4

los-hospital

15.69  $\pm$  15.02

17.27  $\pm$  15.71

0.0038

148237.0

16.98  $\pm$  15.59

10.36

13.08

5

==( los-icu: survivors )==

484.0

100.0%

4034.0

100.0%

(VAC)

(no VAC)

(VAC)

(no VAC)

6

los-icu

17.87  $\pm$  11.49

12.39  $\pm$  9.41

1.26e-44

1356264.0

12.98  $\pm$  9.8

14.81

9.5

7

==( los-icu: non - survivors )==

273.0

100.0%

1223.0

100.0%

(VAC)

(no VAC)

(VAC)

(no VAC)

8

los-icu

11.32  $\pm$  10.03

11.93  $\pm$  9.3

0.0135

151002.5

11.82  $\pm$  9.43

8.17

9.25
